# Supplementary material for: Three-dimensional graphene-based aerogels prepared by a self-assembly process and its excellent catalytic and absorbing performance
Source: Royal Society of Chemistry journal article supplement (doi:10.1039/c3ta10989e), 2013-01-01
Supplement: c3ta10989e.pdf [file c3ta10989e.pdf]

**Three-dimensional graphene-based aerogels prepared by a self-assembly  
process and its excellent catalytic and absorbing performance**

Tao Wu<sup>1</sup> Mingxi Chen<sup>1</sup> Lei Zhang<sup>1</sup> Xiaoyang Xu<sup>1</sup> Yu Liu<sup>1</sup>

Jing Yan<sup>1\*</sup> Wei Wang<sup>2</sup> Jianping Gao<sup>1\*</sup>

<sup>1</sup>School of Science, <sup>2</sup>School of Chemical Engineering, Tianjin University, Tianjin  
300072, P R China

**Preparation of GO**

Graphene oxide was prepared from natural graphite by a modified Hummer's method.<sup>1-3</sup> Briefly, concentrated H<sub>2</sub>SO<sub>4</sub> was added to a 250-mL flask filled with graphite. Next NaNO<sub>3</sub> was added and then solid KMnO<sub>4</sub> was gradually added with stirring while the temperature of the mixture was kept below 20 °C. Next the temperature was increased to 30 °C and excess distilled water was added to the mixture and then the temperature was increased to 80 °C. Finally, 30% H<sub>2</sub>O<sub>2</sub> was added until the color of mixture changed to brilliant yellow. The mixture was filtered and washed several times with 5% aqueous HCl to remove metal ions and then washed with distilled water to remove the acid. The resulting filter cake was dried in air and then re-dispersed into water. Suspended GO sheets were obtained after ultrasonic treatment.

---

\* Corresponding authors: Fax: +86 22 274 034 75.

E-mail address: [jianpinggao2012@126.com](mailto:jianpinggao2012@126.com) (J. Gao), [yanjingls2012@163.com](mailto:yanjingls2012@163.com) (J. Yan).

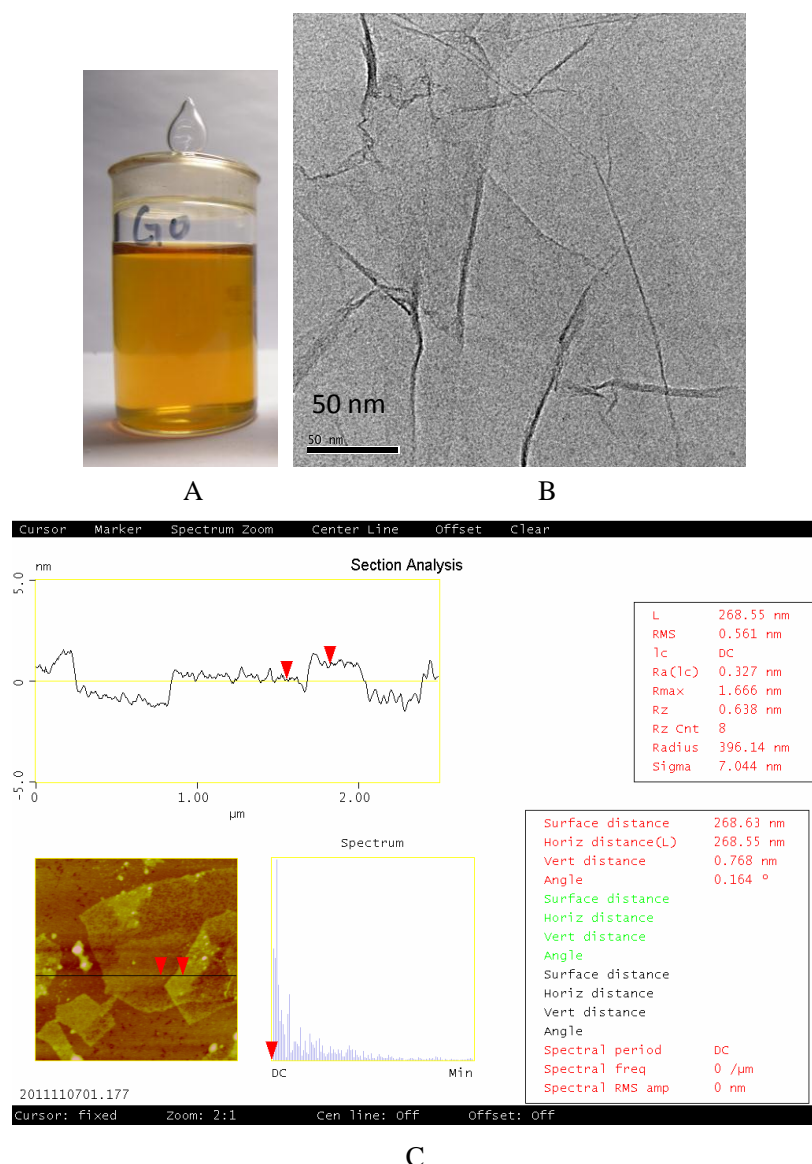

Fig. S1 (A) Optical photos of stable GO suspension; (B) the TEM and (C) AFM image of GO nanosheets

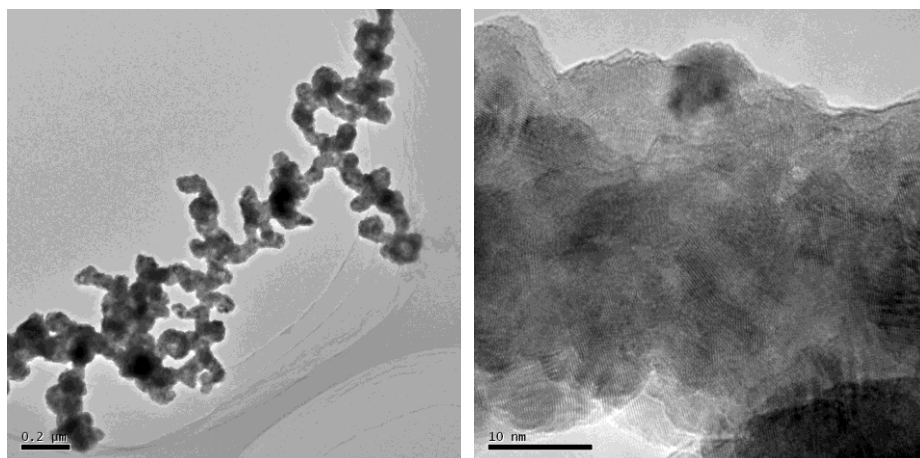

Fig. S2 The TEM images of Cu nanoparticles

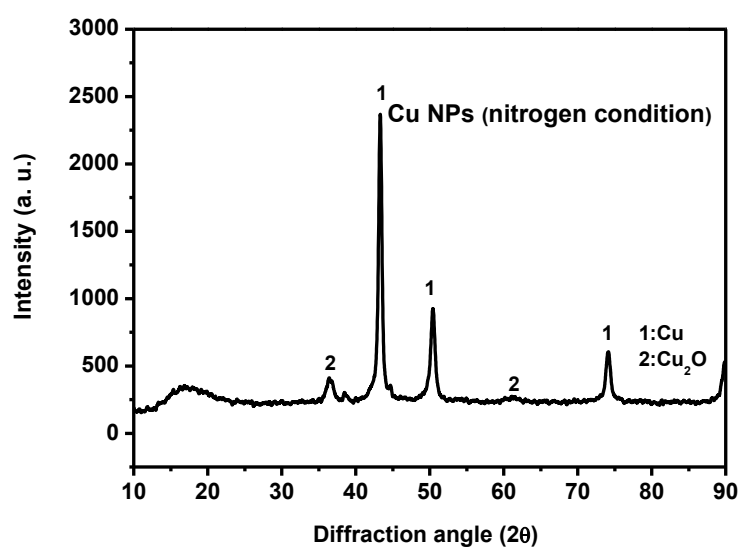

Fig. S3 XRD pattern of pure Cu nanoparticles

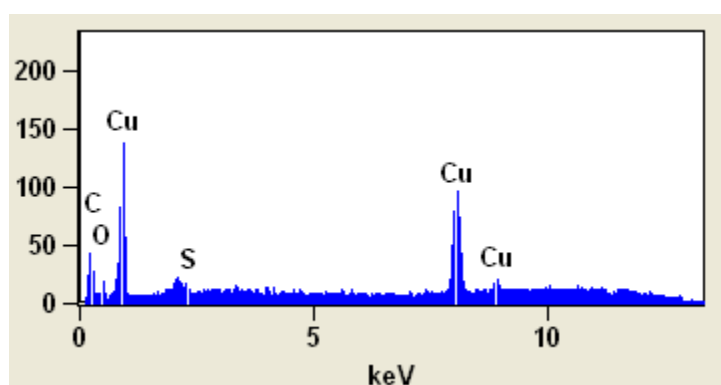

Fig. S4 EDS analysis of particles enwrapped in the GA

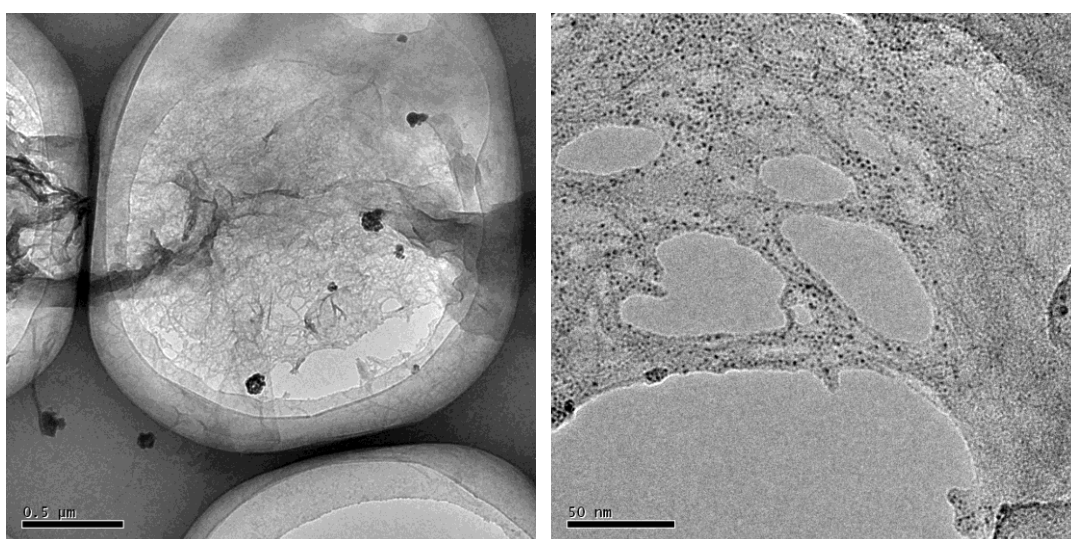

Fig. S5 TEM images of GH after three cycles

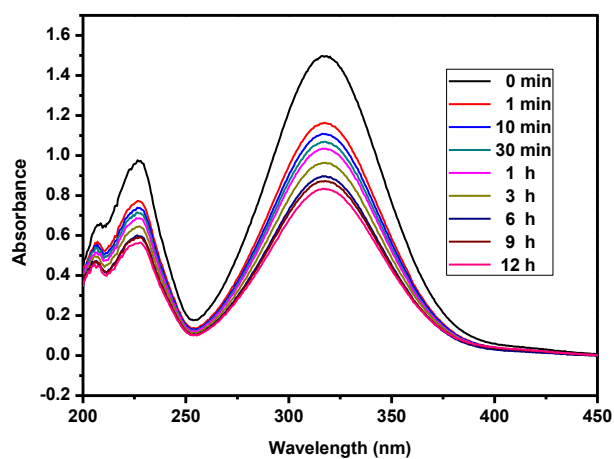

Fig. S6 Time-dependent UV-vis absorption spectra of the adsorption of 4-NP by GA

#### References

- 1 W. Hummers and R. Offeman, *J. Am. Chem. Soc.*, 1958, **80**, 1339–1340.
- 2 T. Wu, X. R. Wang, H. X. Qiu, J. P. Gao, W. Wang and Y. Liu, *J. Mater. Chem.*, 2012, **22**, 4772-4779.
- 3 N. N. Zhang, H. X. Qiu, Y. Liu, W. Wang, Y. Li, X. D. Wang and J. P. Gao, *J. Mater. Chem.*, 2011, **21**, 11080-11083.
